## Identification of powdery mildew resistance QTL in *Fragaria x ananassa*

Helen M. Cockerton<sup>1</sup>, Robert J. Vickerstaff<sup>1</sup>, Amanda Karlström<sup>1</sup>, Fiona Wilson<sup>1</sup>, Maria Sobczyk<sup>1</sup>, Joe Q. He<sup>1</sup>, Daniel J. Sargent<sup>2</sup>, Andy J. Passey<sup>1</sup>, Kirsty J. McLeary<sup>1</sup>, Katalin Pakozdi<sup>2</sup>, Nicola Harrison<sup>1</sup>, Maria Lumbreras-Martinez<sup>1</sup>, Laima Antanaviciute<sup>1</sup>, David W. Simpson<sup>1</sup> and Richard J. Harrison<sup>1</sup>

1. NIAB EMR, New Road, East Malling, Kent, ME19 6BJ
2. Driscolls' Genetics Ltd, East Malling Enterprise Center, New Road, East Malling, Kent, ME19 6BJ

**Corresponding author:** Richard J. Harrison

**Email:** Richard.Harrison@EMR.ac.uk

**Telephone number:** +44 (0)1732 523747

### ORCID ID

Richard Harrison 0000-0002-3307-3519

### Acknowledgements

The authors acknowledge funding from the Biotechnology and Biological Sciences Research Council (BBSRC) BB/K017071/1 and Innovate UK project 100875. The authors acknowledge Phil Brain, Eric van de Weg and Xiangming Xu for statistical advice. The authors also acknowledge INRA and CRAG for contributing their mapping population data to the strawberry consensus linkage map.

### Key Message

Powdery mildew resistance in two strawberry mapping populations is controlled by both stable and transient novel QTL of moderate effect. Some transferability of QTL across wider germplasm was observed.

**Key Message word count:** 29 (Max 30)

1 **Abstract**

2 The obligate biotrophic fungus *Podosphaera aphanis* is the causative agent of powdery  
3 mildew on cultivated strawberry (*Fragaria x ananassa*). Genotypes from two bi-parental  
4 mapping populations 'Emily' x 'Fenella' and 'Redgauntlet' x 'Hapil' were phenotyped for  
5 powdery mildew disease severity in a series of field trials. Here we report multiple QTL  
6 associated with resistance to powdery mildew, identified in ten phenotyping events  
7 conducted across different years and locations. Seven QTL show a level of stable  
8 resistance across multiple phenotyping events however many other QTL were represented  
9 in a single phenotyping event and therefore must be considered transient. One of the  
10 identified QTL was closely linked to an associated resistance gene across the wider  
11 germplasm. Furthermore, a preliminary association analysis identified a novel conserved  
12 locus for further investigation. Our data suggests that resistance is highly complex and that  
13 multiple additive sources of quantitative resistance to powdery mildew exist across  
14 strawberry germplasm. Implementation of the reported markers in marker-assisted  
15 breeding or genomic selection would lead to improved powdery mildew resistant  
16 strawberry cultivars, particularly where the studied parents, progeny and close pedigree  
17 material are included in breeding germplasm.

18

19 **Abstract word count:** 183 (Min- Max 150 - 250)

20

21 **Key words:** *Podosphaera aphanis*, strawberry, breeding, pathology-experiments, plink.

22

23

24

25

## 26 **Introduction**

27 *Podosphaera aphanis* (syn. *Sphaerotheca macularis*) is a global pathogen on strawberry  
28 (*Fragaria x ananassa*) (Peries 1962), where late season infestations in untreated fields  
29 result in unmarketable fruit and severe yield loss (Nelson et al 1995). Powdery mildew was  
30 rated the most important disease by large UK strawberry producers (Calleja 2011), with  
31 65% of UK growers reporting common outbreaks of *P. aphanis* (Calleja 2011). The  
32 transfer of strawberry field production into protected systems has been associated with a  
33 heightened incidence of powdery mildew and greater fungal biomass has been observed  
34 on strawberry fruits in polytunnel environments (Xiao et al 2001).

35

36 *Podosphaera aphanis* infects the leaves, fruit, stolon and flowers of strawberry plants  
37 (Paulus 1990). A higher disease level on the abaxial (lower) leaf surface, is due to  
38 infection of emergent susceptible leaves before unfolding, with ontogenic resistance  
39 developing in the adaxial surface prior to exposure (Asalf et al 2014). For conidia on host  
40 tissue, optimum conditions for germination and colony establishment can lead to disease  
41 symptom development within four days, upon which conidiation begins anew (Amsalem et  
42 al 2006). Although a high relative humidity (RH) is required for germination and release of  
43 conidia (Amsalem et al 2006), conidial germination is inhibited by free water (Peries 1962).  
44 The sexual ascospores overwintering on dead plant foliage are considered to be a major  
45 sources of infection in early spring, as such, the removal of old strawberry foliage as a  
46 source of inoculum should reduce epidemics (Xu et al 2008a).

47

48 *P. aphanis* is considered to have a small host range with host specificity of strawberry and  
49 raspberry (Harvey and Xu 2010). Across the powdery mildews it is understood that many  
50 host-specific adaptations have arisen through convergent evolution, with over 400 different

51 fungal species causing powdery mildew on 9838 different angiosperm hosts (Amano 1986;  
52 Braun 1987; Mori et al 2000).

53

54 For strawberries, powdery mildew is primarily controlled using fungicide application as  
55 many varieties have poor levels of disease resistance. Fungicides with modes of action  
56 targeting fungal respiration, nucleic acid synthesis, sterol biosynthesis and signal  
57 transduction are commonly used to control *P. aphanis* on strawberry (Lainsbury 2016).  
58 However, the evolution of resistance to sterol demethylation inhibitor fungicides has posed  
59 challenges for *P. aphanis* control (Sombardier et al 2010). Such challenges have been  
60 exacerbated by the loss of active ingredients associated with stricter European regulations  
61 (e.g. 91/414/EEC; (Colla et al 2012), highlighting a greater requirement for *P. aphanis*  
62 resistant breeding resources.

63

64 Previous studies have shown high variation in powdery mildew resistance within  
65 strawberry breeding germplasm and high heritability of resistance, indicating the large  
66 potential for enhancing disease resistance through breeding (Nelson et al 1995). Utilisation  
67 of pre-breeding data and marker-assisted or genomic selection (Whitaker et al 2012) will  
68 aid the production of durable powdery mildew resistance and reduce growers reliance on  
69 fungicide control.

70

71

## 72 **Materials and Methods**

73 Plant material was created through a cross between the powdery mildew resistant  
74 strawberry cultivar 'Emily' and the susceptible cultivar 'Fenella' to produce a mapping  
75 population of 181 individuals which segregates for mildew resistance. This was

76 phenotyped over four years in six locations denoted; 2011, 2012a, 2012b, 2013a, 2013b,  
77 2014. All phenotyping events were conducted at East Malling Research, Kent, UK (now  
78 NIAB EMR) except 2013b which was conducted in Paraje Moriteja, Rociana del Condado,  
79 Spain. An additional pre-established mapping population was phenotyped for mildew  
80 resistance; the 'Redgauntlet' x 'Hapil' (RxH) mapping population (168 individuals) was  
81 phenotyped in 2012, 2013, 2014 and 2016 at East Malling (Sargent et al 2012). Plants  
82 were maintained in a polytunnel and runners were pinned down into 9 cm pots containing  
83 compost and transferred into polythene covered raised beds with trickle irrigation. Raised  
84 beds were fumigated with chloropicrin to control soil borne pests and diseases. Plants  
85 were strimmed in early July (or mid April in Spain; 2013b) to remove old leaf material and  
86 expose young foliage; strimming ensures simultaneous disease development of new leaf  
87 material. Plantings were downwind of established strawberry plots, which provided a  
88 natural source of inoculum. Infection of mildew was allowed to establish within the field  
89 plots. Plants were arranged in a randomized block design with 3-6 replicate plants per  
90 genotype. Disease scores were recorded twice between late July and early September in  
91 UK field plots as dictated by disease symptom progression, and during May in the Spanish  
92 plot. Plants were scored for mildew disease symptoms based on an existing scale  
93 (Simpson 1987), where scores denote: 1- a healthy plant with no visible disease  
94 symptoms, 2- slight leaf curling with no visible mycelium, 3- leaf curling and mottling 4-  
95 severe leaf curling, redding and visible damage to lower leaf surface, 5- severe necrosis  
96 and some leaf death. A validation set of 75 cultivars and accessions were phenotyped in  
97 2017 with 10 replicate plants per accession.

98

99 **Linkage map generation.** DNA was extracted from new leaf material using the Qiagen  
100 DNAeasy plant mini extraction kit according to the manufacturer's instructions. Biparental

101 populations were genotyped using the Affymetrix IStraw90 Axiom® array (i90k) containing  
102 approximately 90 thousand potential genetic markers (Bassil et al 2015). Cultivars and  
103 accessions were genotyped on either the i90k and/or the streamlined Axiom® IStraw35  
104 384HT array (i35K, containing approximately 35 thousand markers; Verma et al 2017).  
105 The linkage maps were created using the Crosslink program  
106 (<https://github.com/eastmallresearch/crosslink>) designed for octoploid linkage map  
107 development (Vickerstaff and Harrison 2017). Haplotype blocks lacking recombination in  
108 any of the progeny were identified for each mapping population and were used to identify  
109 neighbouring SNPs identified in both mapping populations that may represent the same  
110 QTL and resistance allele. In the ‘Redgauntlet’ x ‘Hapil’ linkage map the average distance  
111 between markers is 0.75 cM, there are gaps > 20 cM on chromosome 1D, 4D and 6C. In  
112 the ‘Emily’ x ‘Fenella’ linkage map the average distance between markers is 0.71 cM there  
113 are gaps >20 cM on chromosome 2C, 3B, 3D, 4D and 5C.

114

## 115 **Statistical analysis.**

116 **Phenotype calculation.** The area under the disease progression curve (AUDPC)  
117 was calculated for each phenotyping event using the R package “agricolae” (Felipe 2017)  
118 to predict scores for QTL analysis. Best linear unbiased prediction (BLUP) was calculated  
119 using the relative AUDPC across phenotyping events, to predict overall genotype scores  
120 for QTL analysis using the R package “nlme” (Pinheiro et al 2017).

121 **QTL identification.** Disease resistance QTL were identified using Kruskal–Wallis  
122 analysis for each marker; the most significant marker was automatically selected for each  
123 linkage group and marker type before conducting a stepwise AIC linear model selection in  
124 R. QTL effect size was calculated based on the output parameters from the predictive  
125 linear model. A permutation test was conducted based on 10,000 iterations of randomly

126 selected data to determine that significance selection value was not required. The  
127 consensus map was generated using marker data from five mapping populations  
128 ('Redgauntlet' x 'Hapil', 'Emily' x 'Fenella', 'Flamenco' x 'Chandler', 'Capitola' x 'CF1116';  
129 INRA, 'Camerosa' x 'Dover'; CRAG). Marker positions were anchored to the *F. vesca*  
130 genome v2.0 (Tennesen et al. 2014), to allow the locations of QTL to be placed onto the  
131 physical map.

132 **Comparison of phenotyping events.** Mixed effect models using the relative  
133 AUDPC values were used to assess the relative importance of genotype, environment and  
134 Genotype x Environment interactions on disease severity across phenotyping events. The  
135 models with and without each component were compared using analysis of variation  
136 (ANOVA). Normal residuals for AUDPC scores were confirmed using the Kolmogorov-  
137 Smirnov test. A two-way ANOVA on the relative AUDPC values allowed comparison of  
138 disease severity between phenotyping events.

139 **QTL validation.** The QTL analysis is conducted using the i90k marker data in  
140 order to best represent the position of the resistance marker, however the QTL analysis  
141 was repeated using the subset of i90k markers represented in the i35k chip and validation  
142 set, allowing the identification of substitute i35k markers associated with each QTL and  
143 comparison with an expanded validation panel of cultivars. Substitute i35k markers are on  
144 the same haplotype as the QTL identified in the i90k analysis in the mapping population,  
145 therefore they are analogous but may have a weaker association with resistance due to  
146 their increase genetic distance from the 'best' marker in the mapping population.  
147 Restricted maximum likelihood (REML) was used to determine the strength of association  
148 between the substitute focal SNPs and the resistance allele in the wider germplasm using  
149 the R package "lme4" (Bates et al 2014) allowing the identification of markers in linkage

150 disequilibrium (LD) with the QTL. A linear model between the observed and predicted  
151 phenotype was produced for QTL with strong marker-trait associations.

152       **Association study.** The subset of SNPs present on the Istraw90k chip, showing at  
153 least 10 % minor allele frequency were screened for association with mildew resistance  
154 ([https://github.com/harrisonlab/popgen/blob/master/snp/gwas\\_quantitative\\_pipeline.md](https://github.com/harrisonlab/popgen/blob/master/snp/gwas_quantitative_pipeline.md)).  
155 This association analysis was conducted on 75 validation accessions using Plink (Purcell  
156 et al 2007),  $p$  values were corrected for population structure and adjusted using the  
157 Benjamini-Hochberg multiple test correction

158       **Identification of candidate resistance genes.** NB-LRR, TM-CC, RLP, RLK (S-  
159 type and general) were identified within the *F. vesca* genome (assembly v1.1) (Shulaev et  
160 al 2011) by screening gene models for motifs following established pipelines (Li et al  
161 2016). Candidate susceptibility factors candidate MLO genes identified in Rosaceous  
162 crops by Pessina et al. (Pessina et al 2014) and resistance genes were identified within  
163 100 kbp of the significant QTL using BEDtools (Quinlan and Hall 2010) and tblastx (Karlin  
164 and Altschul 1993) against the NCBI database to determine any characterised function of  
165 homologous genes.

166

167

168



## 169 **Results**

170

### 171 **Disease pressure varies between years and sites**

172 The greatest proportion of variance in the relative AUDPC values was explained by the  
173 environment for both populations ('Emily' x 'Fenella':  $X^2_{(4,5;1)} = 1264.7$ ;  $p < 0.001$ ,  
174 'Redgauntlet' x 'Hapil':  $X^2_{(4,5;1)} = 374.83$ ;  $p < 0.001$ ) followed by genotype ('Emily' x  
175 'Fenella':  $X^2_{(1)} = 322.97$ ;  $p < 0.001$ , 'Redgauntlet' x 'Hapil':  $X^2_{(4,5;1)} = 143.96$ ;  $p < 0.001$ ).  
176 The phenotyping events in 2014 showed low disease symptoms across both populations  
177 suggesting either low disease pressure or low environmental conductivity (Fig 1). A  
178 significant effect of Genotype x Environment interaction was observed in both populations  
179 ('Emily' x 'Fenella':  $X^2_{(4,5;1)} = 170.66$ ;  $p < 0.001$ , 'Redgauntlet' x 'Hapil':  $X^2_{(4,5;1)} = 29.11$ ;  $p <$   
180  $0.001$ ). Across phenotyping events, broad sense heritability factors varied between 24.1-  
181 59.0 for 'Emily' x 'Fenella' and 40.1- 53.8 for 'Redgauntlet' x 'Hapil', revealing a moderate  
182 proportion of the variation in the data can be explained by the genetic variation, and that  
183 there is a moderate to large environmental influence on disease symptom expression  
184 (Table 1). Nonetheless, the correlation analysis showed significant, positive correlations  
185 between disease scores for all the phenotyping events (Fig 2). The 2013b phenotyping  
186 event showed the greatest correlation across all 'Emily' x 'Fenella' phenotyping events with  
187 an average correlation coefficient of 0.58.

188

### 189 **Stable and transient QTL are detected in the individual analyses**

190 Five stable QTL (*FaRPa2A*, *FaRPa4A*, *FaRPa5B*, *FaRPa6D2*, *FaRPa7D*) were associated  
191 with powdery mildew resistance in more than one phenotyping event and the combined  
192 analysis. The focal SNP associated with powdery mildew resistance, representing the  
193 stable QTL *FaRPa6D2* was consistently identified on linkage group 6D in Redgauntlet

194 across three phenotyping events and in the combined analysis. This allele is situated  
195 within 9.2 kbp of a putative resistance gene containing an RLK domain on chromosome six  
196 of the *F. vesca* genome. Highly significant QTL in 'Emily' were identified between 0.3-5.9  
197 Mb on linkage group 1C '0' haplotype in four individual phenotyping events and the  
198 combined analysis (Table 2 & Sup. Table 1). QTL on linkage group 1C represent some of  
199 the most significant markers associated with mildew resistance found in this study,  
200 however the QTL position shifts depending upon the phenotyping event. Six focal SNPs  
201 were detected in two or more individual phenotyping events and multiple transient QTL  
202 were detected (Sup. Table 1).

203

204 In the combined analysis 7 QTL identified in the 'Emily' x 'Fenella' mapping population (Fig  
205 3) with a combined effect of 45.2 % (Proportional reduction of error (PRE) 82%) whereas  
206 the combined effect of the 5 QTL identified in the 'Redgauntlet' x 'Hapil' mapping  
207 population was 40.4% (PRE 45.1% ; Fig 4). Of the 12 QTL identified, ten were associated  
208 with putative resistance genes in *F. vesca*, three of which fall inside a resistance gene  
209 (Table 2). Although none of the identified QTL fall within the assigned threshold of the  
210 putative MLO genes, *FaRP2A* is 133,210 bp away from the MLO-like-protein gene  
211 *04.XM\_004290718.2*. The combined analysis pulled out nine QTL identified in at least one  
212 of the individual phenotyping events and three novel QTL. No epistatic interactions were  
213 found between QTL identified in the combined analysis, indicating resistance is controlled  
214 by additive genetic components in the two populations.

215

## 216 **Detected QTL explain a large portion of the observed phenotypic variation**

217 The coefficients of determination ( $R^2$ ) for the linear regression models of all phenotyping  
218 events show positive relationships between predicted and observed values, with between

219 20.6 % and 73.1 % of variation in observed scores explained by the identified QTL (Table  
220 1).

221

### 222 **Some QTL are detected in similar regions across the two populations.**

223 No 'neighbouring' focal SNPs within 1.5 Mb were identified in combined analysis' between  
224 the 'Redgauntlet' x 'Hapil' and 'Emily' x 'Fenella' populations (Fig 5). The individual  
225 analyses identified neighbouring focal SNPs from both populations on linkage groups 3C  
226 and 7D (Sup. Fig 1). The neighbouring markers on the top of linkage group 3C are 3.3 cM  
227 apart respectively in the 'Redgauntlet' x 'Hapil' population with the resistance-conferring  
228 allele present in the same phase. The neighbouring focal markers on 7D are present on  
229 different parents in the 'Redgauntlet' x 'Hapil' population however no recombination is  
230 observed between the markers, therefore we conclude that the QTL identified in the two  
231 populations on linkage group 7D represent the same QTL.

232

### 233 **QTL are poorly associated with phenotype in the wider germplasm**

234 The combined transferable QTL analysis for the 'Emily' x 'Fenella' population produced  
235 four i35k substitute SNPs co-localising with focal SNPs identified in the i90k analysis  
236 whereas the position of two focal SNPs had shifted and one was not identified (Sup. Fig  
237 2). The combined transferable QTL analysis for the 'Redgauntlet' x 'Hapil' population  
238 produced four i35k focal SNPs co-localising with those identified in the i90k analysis and  
239 one focal SNPs locations had shifted. This analysis was associated with a slight loss in  
240 power to detect QTL positions but allowed QTL to be screened across the wider  
241 germplasm. One of the focal SNPs identified in the combined analysis on linkage group 4C  
242 maintained a strong association with resistance across the wider germplasm. This QTL  
243 explained 31.6 % of the variation in disease scores observed in the validation germplasm

244 (Sup. Fig 3) The association analysis of the validation set identified multiple SNPs  
245 representing a single locus on linkage group 6C (Fig 6; Table 2), however this locus does  
246 not appear to contribute to the resistance of the mapping populations.

247

248

## 249 Discussion

250

251 Comparison of disease scores across phenotyping events revealed the presence of a  
252 Genotype x Environment interaction in both populations. This was also observed in similar  
253 experiments from other groups (Kennedy et al 2013). The variation in phenotypic scores  
254 between each experiment can be explained by differences in a combination of (i) the  
255 genetic diversity of the inoculum source (ii) inoculum load and (iii) environmental  
256 conditions.

257

258 Each phenotyping experiment relied on natural inoculum from nearby plantings resulting in  
259 a different admixture of inoculum. There has been no report of race structure between *P.*  
260 *aphanis* and strawberry to date, furthermore isolates from Italy and Israel were found to be  
261 homogenous after attempts to develop five discriminatory markers revealed monomorphic  
262 loci (Fiamingo et al 2007). It was hypothesised that this may be attributed to low genetic  
263 variability in strawberry germplasm or low variation between mildew isolates (Xu et al  
264 2008b). However, there is some evidence to suggest heterogeneity between populations  
265 of *P. aphanis*: namely the evolution of fungicide resistance (Sombardier et al 2010) and  
266 the resistance breaking in the cultivar Korona, likely due to the evolution of more virulent  
267 strains (Davik and Honne 2005). Reports of the production of ascospores in UK infections  
268 indicates the presence of a sexual cycle within powdery mildew (Xu et al 2008a), high  
269 recombination associated with this life cycle typically leads to greater genetic diversity than  
270 observed in asexual reproduction (Barrett et al 2008). Qualitative resistance is associated  
271 with race specific interactions and typically the resistance is non-durable due to the R gene  
272 targeting a dispensable effector gene (Geiger and Heun 1989; Vleeshouwers et al 2011). It  
273 was observed that resistance to *P. aphanis* within new strawberry selections is not durable

274 over time and across varying environmental conditions, however, it cannot be determined  
275 whether this is due to unstable resistance or variable mildew strains (McNicol and Gooding  
276 1979; Nelson et al 1995; Xu et al 2008b). These examples indicate the requirement for  
277 constant breeding and selection for powdery mildew resistance in strawberry.

278

279 It has been suggested that different genes confer resistance to mildew depending on the  
280 inoculum level (Nelson et al 1995; Nelson et al 1996; Kennedy et al 2013). Due to the  
281 natural inoculation method, phenotyping events varied in inoculum load and such variation  
282 may create differential induction of systemic resistance. Future mildew infection  
283 experiments could aim to quantify field inoculum levels to qualify resistance genes as  
284 effective under low or high inoculum levels. The infection levels of neighbouring plants will  
285 influence the inoculum load experienced by a given plant and therefore the resistance  
286 status (Hughes et al 1997). However, the randomisation, replication of field experiments  
287 and combined analysis should mitigate any issues related to spatial autocorrelation.

288

289 Environmental conditions affect the sporulation, germination and establishment of *P.*  
290 *aphanis* conidia. Optimum conditions for germination occur between 75-98 % RH and  
291 between 15-25 °C with disease symptoms observed 4 days after germination (Amsalem et  
292 al 2006). Expression of quantitative disease resistance is influenced by soil, weather and  
293 age of plant material (Geiger and Heun 1989). The plants in each phenotyping event will  
294 be exposed to different environmental conditions. However, the two phenotyping events  
295 2012a and 2012b were conducted within 500 meters and therefore have experienced a  
296 similar macro-environment and inoculum admixture. The coefficient of determination of  
297 30% between 2012a and 2012b phenotyping events indicates a moderate correlation of  
298 disease score.

299

300 A strong correlation was observed between strawberry cultivar powdery mildew resistance  
301 assessed in the field and polytunnel environments (Gooding et al 1981; Nelson et al 1996;  
302 Kennedy et al 2013). Therefore our powdery mildew field assessments should reflect  
303 resistance levels exhibited in a polytunnel environment and supports transferability of  
304 resistance alleles from field to polytunnel environments. Furthermore plant nutrient status  
305 has been found to impact mildew resistant status. Indeed, low calcium levels were  
306 associated with weakened mildew resistance response in the cultivar 'Aroma' (Palmer  
307 2007). However, fertigation was applied to all plots mitigating the potential for plant nutrient  
308 status to impact mildew disease scores.

309

310 The QTL analysis was performed individually for each phenotyping event, allowing the  
311 identification of both stable and transient QTL. A different suite of QTL from 'Emily' x  
312 'Fenella' were identified as significant for each of the six phenotyping events indicating that  
313 the resistance is indeed complex and quantitative. However, six QTL have support across  
314 two or three years of phenotyping. Therefore, relatively few stable QTL are observed  
315 alongside multiple transient QTL. Stable and transient QTL were also found to control  
316 apple powdery mildew resistance (Calenge and Durel 2006). Stable QTL represent alleles  
317 involved in disease resistance on the majority of infection events however transient QTL  
318 may represent genes that have an environment specific interaction and as such are  
319 important in only some infection events. The large number of transient QTL may be  
320 attributed to the variation in inoculum source, inoculum load and environmental conditions  
321 between treatments. We found multiple QTL of small to moderate effect control disease  
322 resistance in both populations. Likewise, previous studies have found multiple small effect  
323 QTL which contribute to powdery mildew resistance in strawberry indicating quantitative

324 resistance with both additive and nonadditive genetic components (Simpson 1987; Nelson  
325 et al 1995; Davik and Honne 2005).

326

327 Previous studies have shown 'Hapil' has an estimated breeding value for mildew  
328 resistance of 0.036 ( $\pm$  0.095) showing almost no genetic component for mildew  
329 susceptibility status in this cultivar (Davik and Honne 2005). Here we show several QTL  
330 associated with resistance can be identified in the Hapil cultivar indicating that powdery  
331 mildew disease status contains a genetic component in this cultivar. Heritability factors  
332 observed in the study are lower than the field based disease severity in studies conducted  
333 by Nelson et al. (Nelson et al 1995) of 0.7, which indicates a strong genetic component. It  
334 has also been found that higher heritability values are associated with high infection levels  
335 due to a greater uniform inoculum distribution (Nelson et al 1995). Due to the natural  
336 inoculation process there is the potential for a patchy inoculum dispersal across the field  
337 site, this may explain relatively low heritability scores.

338

339 Genotyping and field phenotyping of the validation accessions revealed that one of the  
340 resistance QTL was associated with resistance within the wider strawberry germplasm,  
341 indicating a strong candidate marker for further study. However, the moderately low  
342 transferability of markers highlights the likelihood for multiple sources of powdery mildew  
343 resistance across strawberry germplasm and the need for an enhanced panel of genetic  
344 markers that fully represent the diversity present in strawberry germplasm.

345 When validating QTL identified in a bi-parental cross over the wider germplasm, a  
346 reduction in the number of informative loci is anticipated due to the lack of LD between the  
347 markers 'tagging' resistance in a bi-parental population and the QTL. Based upon the  
348 design of the i90k and subsequent arrays, it is likely that these only capture a tiny fraction  
349 of the genetic variation, based on the limited discovery panel that was used during the



350 array design (Bassil et al 2015). The focus on the selection of common SNPs for the i35k  
351 array also means that low frequency markers present on the i90k are also absent (Verma  
352 et al 2017). Furthermore, if QTL are at low frequencies in the wider population, it is unlikely  
353 that the underpowered preliminary association study that we have carried out will have  
354 sufficient power to detect QTL.

355

356 Nonetheless, here we observe one conserved resistance QTL across the wider strawberry  
357 germplasm and highlight the potential for some limited transferability of markers into  
358 resistance breeding. Future work will seek to identify the candidate resistance genes  
359 associated with the QTL on linkage group 1C and 6D and screen for presence of more  
360 candidate resistance genes across the wider germplasm. Work will seek to identify the  
361 mechanism of resistance in the cultivars 'Emily' and 'Redgauntlet'. Such work has been  
362 conducted on the powdery mildew resistant cultivar 'Aroma', where poor colony  
363 establishment was associated with the identification of a putative antimicrobial protein  
364 (Palmer 2007). Additionally, lower conidial attachment was associated with high cutin acid  
365 in 'Aroma' leaf cuticles, indeed high cutin acid has been extracted from many resistant  
366 strawberry cultivars (Peries 1962; Jhooty and McKeen 1965). Relatively high powdery  
367 mildew resistance was observed in Florida cultivars from wild accessions of *Fragaria*  
368 *virginiana* after successful introgression into strawberry breeding germplasm highlighting  
369 the potential of natural reserves of resistance to be used in crop breeding programmes  
370 (Kennedy et al 2013).

371

372 The magnitude of disease symptom variation shows great potential to enhance mildew  
373 resistance. The most resistant accession was 3.2 times more resistant than the most  
374 susceptible within the validation accessions. We conclude that multiple QTL of small effect  
375 control disease resistance and that principally a different suite of alleles control resistance  
376 in the two studied populations, with a limited overlap. The small effect size of loci promotes  
377 a genomic selection breeding approach for powdery mildew resistance in strawberry, as

378 this may be most effective at capturing the wide range of small effect QTL that are likely to  
379 be present in a breeding programme. Any training population would need to be  
380 phenotyped in multiple environments and years in order to capture the diverse expression  
381 of QTL and fully maximise the power of a GS approach. Furthermore, a more detailed  
382 study of the pathogen's population structure and host interactions is needed to quantify the  
383 contribution of pathogen diversity to transient QTL.

384

385 Ultimately, the production of mildew resistant strawberry cultivars will reduce grower  
386 reliance on chemical fungicide for control of powdery mildew; such control options are  
387 particularly important with respect to reducing consumer concerns over pesticide residues  
388 and also where deregulation of existing fungicide actives is reducing disease management  
389 options.

## 390 Figure Legends

391

392 **Fig. 1** Average relative area under the disease progression curve (rAUDPC) across all  
393 genotypes for each phenotyping event. Error bars are standard errors.

394

395 **Fig. 2** Pearson correlation matrix of powdery mildew area under the disease progression  
396 curve phenotype data for the strawberry mapping populations a) 'Emily' x 'Fenella' and b)  
397 'Redgauntlet' x 'Hapil'. Numbers are  $R^2$  values.

398

399 **Fig. 3** Kruskal-Wallis  $-\log_{10}$  p-values denoting the association of single nucleotide  
400 polymorphism with strawberry powdery mildew disease scores at each position in the  
401 octoploid strawberry genome in cM. Panels represent markers segregating in  
402 'Redgauntlet', 'Hapil' and both parents. Labels 1A-7D denote the 28 linkage groups. Solid  
403 horizontal line is  $p= 0.05$ , dashed horizontal line is  $p= 0.01$ . Black line denotes combined  
404 analysis using the best linear unbiased prediction calculated across all phenotyping  
405 events. Colour denotes phenotyping event blue- 2012, teal- 2013, green- 2014, pink-  
406 2016.

407

408 **Fig. 4** Kruskal-Wallis  $-\log_{10}$  p-values denoting the association of single nucleotide  
409 polymorphism with strawberry powdery mildew disease scores at each position in the  
410 octoploid strawberry genome in cM. Panels represent markers segregating in 'Emily',  
411 'Fenella' and both parents. Labels 1A-7D denote the 28 linkage groups. Solid horizontal  
412 line is  $p= 0.05$ , dashed horizontal line is  $p= 0.01$ . Black line denotes combined analysis  
413 using the best linear unbiased prediction calculated across all phenotyping events. Colour  
414 denotes phenotyping event olive green- 2011, light blue- 2012a, green- 2012b red- 2013a,  
415 blue- 2013b (Spain), pink- 2014.

416

417 **Fig. 5** Linkage map displaying 35154 marker positions (grey) in Mb for 28 linkage groups  
418 of octoploid strawberry (1A-7D) marker positions scaled to the *F. vesca* genome. QTL  
419 locations from combined analysis 'Emily' x 'Fenella' (red) 'Redgauntlet' x 'Hapil' (purple)  
420 and from the targeted marker association analysis (black) point size denotes significance  
421 level of QTL.

422

423 **Fig. 6** Unadjusted  $-\log_{10}$  p-values from plink denoting the association of single nucleotide  
424 polymorphism with strawberry powdery mildew disease scores at each position in the

425 octoploid strawberry genome in cM, where known. Labels 1A-7D denote the 28 linkage  
426 groups. Solid horizontal line is  $p=0.05$  after Benjamin-Hochberg correction.

427

## 428 **Supplementary Figure Legends**

429

430 **Supplementary Fig 1** Linkage map displaying 35154 marker positions (grey) in Mb for 28  
431 linkage groups of octoploid strawberry (1A-7D) marker positions scaled to *F. vesca*  
432 genome. QTL locations from each phenotyping event represented.

433

434 **Supplementary Fig 2** Linkage map displaying marker positions (grey) in Mb for 28 linkage  
435 groups of octoploid strawberry (1A-7D) marker positions scaled to *F. vesca* genome.  
436 Markers overlapping between the validation set and 'Emily' x 'Fenella' and 'Redgauntlet' x  
437 'Hapil' populations are red and blue "-" respectively. QTL locations from combined analysis  
438 'Emily' x 'Fenella' (red) and 'Redgauntlet' x 'Hapil' (purple).

439

## 440 **Author Contributions**

441 RJH, DWS, DJS - Conceived, designed and analysed experiments.

442 AJP - Propagated plant material

443 KJM, NH, KP, ML, AK, HMC, JH - Recorded pathogenicity data in field experiments

444 RJV and AK – Analysed SNP data and made linkage map.

445 HMC – QTL mapping and statistical analysis

446 FW, ML and LA extracted gDNA for SNP chip analysis.

447 MKS- created R gene database and pipeline used for plink analysis

448 HMC and RJH wrote the manuscript. It was not possible to contact ML, KJM and LA for  
449 approval.

450

451

452

## Bibliography

- Amano K (1986) Host range and geographical distribution of the powdery mildew fungi. Japan Scientific Societies Press
- Amsalem L, Freeman S, Rav-David D, et al (2006) Effect of Climatic Factors on Powdery Mildew Caused by *Sphaerotheca macularis* f. sp. *Fragariae* on Strawberry. *Eur J Plant Pathol* 114:283–292. doi: 10.1007/s10658-005-5804-6
- Asalf B, Gadoury DM, Tronsmo AM, et al (2014) Ontogenic resistance of leaves and fruit, and how leaf folding influences the distribution of powdery mildew on strawberry plants colonized by *Podosphaera aphanis*. *Phytopathology* 104:954–963. doi: 10.1094/PHYTO-12-13-0345-R
- Barrett LG, Thrall PH, Burdon JJ, Linde CC (2008) Life history determines genetic structure and evolutionary potential of host-parasite interactions. *Trends Ecol Evol (Amst)* 23:678–685. doi: 10.1016/j.tree.2008.06.017
- Bassil NV, Davis TM, Zhang H, et al (2015) Development and preliminary evaluation of a 90 K Axiom® SNP array for the allo-octoploid cultivated strawberry *Fragaria x ananassa*. *BMC Genomics* 16:1310. doi: 10.1186/s12864-015-1310-1
- Bates D, Mächler M, Bolker B, Walker S (2014) Fitting linear mixed-effects models using lme4. *J Stat Softw* 67:1–48.
- Braun U (1987) A monograph of the Erysiphales (powdery mildews). Schweizerbart Science Publishers, Stuttgart, Germany
- Calenge F, Durel CE (2006) Both stable and unstable QTLs for resistance to powdery mildew are detected in apple after four years of field assessments. *Mol Breeding* 17:329–339. doi: 10.1007/s11032-006-9004-7
- Calleja EJ (2011) The potential impacts of climate change on diseases affecting strawberries and the UK strawberry industry. Doctoral dissertation
- Colla P, Gilardi G, Gullino ML (2012) A review and critical analysis of the European situation of soilborne disease management in the vegetable sector. *Phytoparasitica* 40:515–523.
- Davik J, Honne BI (2005) Genetic variance and breeding values for resistance to a wind-borne disease [*Sphaerotheca macularis* (Wallr. ex Fr.)] in strawberry (*Fragaria x ananassa* Duch.) estimated by exploring mixed and spatial models and pedigree information. *Theor Appl Genet* 111:256–264. doi: 10.1007/s00122-005-2019-3
- Felipe de M (2017) agricolae: Statistical Procedures for Agricultural Research. CRAN, R package
- Fiamingo F, Amsalem L, Maymon M, et al (2007) Sensitivity of two *Podosphaera aphanis* populations to disease control agents. *Journal of Plant pathology* 89:85–96.
- Geiger HH, Heun M (1989) Genetics of quantitative resistance to fungal diseases. *Annual Review of Phytopathology* 27:317–341.
- Gooding HJ, McNicol RJ, et al. (1981) Methods of Screening Strawberries for Resistance to *Sphaerotheca Maculons* (Wall Ex Frier) and *Phytophthora Cactorum* (Leb. and

- Cohn). *The Journal of horticultural science* 56:239–245.
- Harvey N, Xu X (2010) Powdery mildew on raspberry is genetically different from strawberry powdery mildew. *Journal of Plant Pathology* 92:775–779.
- Hughes G, McROBERTS N, Madden LV, et al. (1997) Validating mathematical models of plant-disease progress in space and time. *Mathematical Medicine and Biology* 14:85–112.
- Jhooty JS, McKeen WE (1965) The influence of host leaves on germination of the asexual spores of *Sphaerotheca macularis* (Wallr. ex. Fr.) Cooke. *Canadian journal of microbiology* 11:539–545.
- Karlin S, Altschul SF (1993) Applications and statistics for multiple high-scoring segments in molecular sequences. *Proc Natl Acad Sci USA* 90:5873–5877.
- Kennedy C, Hasing TN, Peres NA, et al. (2013) Evaluation of strawberry species and cultivars for powdery mildew resistance in open-field and high tunnel production systems. *HortScience* 48:1125–1129.
- Lainsbury MA (2016) *The Pesticide Guide*, 29th edn. CABI publishing
- Li P, Quan X, Jia G, et al (2016) RGAugury: a pipeline for genome-wide prediction of resistance gene analogs (RGAs) in plants. *BMC Genomics* 17:852. doi: 10.1186/s12864-016-3197-x
- McNicol RJ, Gooding HJ (1979) Assessment of strawberry clones and seedlings for resistance to *Sphaerotheca macularis* (Wall ex Frier). *Horticultural research*
- Mori Y, Sato Y, Takamatsu S (2000) Evolutionary analysis of the powdery mildew fungi using nucleotide sequences of the nuclear ribosomal DNA. *Mycologia* 91:74–93.
- Nelson MD, Gubler WD, Shaw DV (1995) Inheritance of powdery mildew resistance in greenhouse-grown versus field-grown California strawberry progenies. *Phytopathology* 85:421–424.
- Nelson MD, Gubler WD, Shaw DV (1996) Relative resistance of 47 strawberry to powdery mildew in California Greenhouse and field environments. *Plant disease* 80:326–328.
- Palmer S (2007) Strawberry powdery mildew: epidemiology and the effect of host nutrition on disease. Doctoral dissertation, The University of Adelaide
- Paulus AO (1990) Fungal diseases of strawberry. *HortScience* 25:885–889.
- Peries OS (1962) Studies on strawberry mildew, caused by *Sphaerotheca macularis* (Wallr. ex Fries) Jaczewski. *Annals of Applied Biology* 50:211–224.
- Pessina S, Pavan S, Catalano D, et al (2014) Characterization of the MLO gene family in Rosaceae and gene expression analysis in *Malus domestica*. *BMC Genomics* 15:618. doi: 10.1186/1471-2164-15-618
- Pinheiro J, Bates D, DebRoy S, et al (2017) nlme: Linear and Nonlinear Mixed Effects Models. CRAN, R package
- Purcell S, Neale B, Todd-Brown K, et al (2007) PLINK a toolset for whole-genome association and population-based linkage analysis. 81, *American Journal of Human*

## Genetics

- Quinlan AR, Hall IM (2010) BEDTools: a flexible suite of utilities for comparing genomic features. *Bioinformatics* 26:841–842. doi: 10.1093/bioinformatics/btq033
- Sargent DJ, Passey T, Surbanovski N, Lopez Girona E, Kuchta P, Davik J, Harrison R, Passey A, Whitehouse AB, Simpson DW. (2012) A microsatellite linkage map for the cultivated strawberry (*Fragaria x ananassa*) suggests extensive regions of homozygosity in the genome that may have resulted from breeding and selection. *Theor Appl Genet* 124(7):1229-40. doi: 10.1007/s00122-011-1782-6.
- Shulaev V, Sargent DJ, Crowhurst RN et al., 2011. The genome of woodland strawberry (*Fragaria vesca*). *Nature Genetics* 43, 109–16.
- Simpson DW (1987) The inheritance of mildew resistance in everbearing and day-neutral strawberry seedlings. *Journal of horticultural science* 62:329–334.
- Sombardier A, Dufour M-C, Blancard D, Corio-Costet M-F (2010) Sensitivity of *Podosphaera aphanis* isolates to DMI fungicides: distribution and reduced cross-sensitivity. *Pest Manag Sci* 66:35–43. doi: 10.1002/ps.1827
- Tenessen JA, Govindarajulu R, Ashman TL, Liston A. 2014. Evolutionary origins and dynamics of octoploid strawberry subgenomes revealed by dense targeted capture linkage maps. *Genome Biol Evol.* 6(12):3295-313. doi: 10.1093/gbe/evu261.
- Verma S, Bassil NV, E Van De Weg, et al. (2017) Development and evaluation of the Axiom® IStraw35 384HT array for the allo-octoploid cultivated strawberry *Fragaria x ananassa*. *Acta Hort* 1156:75–82.
- Vickerstaff RJ, Harrison RJ (2017) Crosslink: A fast, scriptable genetic mapper for outcrossing species. *BioRxiv*. doi: 10.1101/135277
- Vleeshouwers VGAA, Raffaele S, Vossen JH, et al (2011) Understanding and exploiting late blight resistance in the age of effectors. *Annu Rev Phytopathol* 49:507–531. doi: 10.1146/annurev-phyto-072910-095326
- Whitaker VM, Osorio LF, Hasing T (2012) Estimation of Genetic Parameters for 12 Fruit and Vegetative Traits in the University of Florida Strawberry Breeding Population. *J Am Soc Hortic Sci* 137:316–324.
- Xiao CL, Chandler CK, Price JF, et al (2001) Comparison of epidemics of *Botrytis* fruit rot and powdery mildew of strawberry in large plastic tunnel and field production systems. *Plant Dis* 85:901–909.
- Xu X, Robinson J, Berrie A (2008a) Potential role of cleistothecia in strawberry powdery mildew. *Soft Fruits*
- Xu X, Robinson J, Simpson D (2008b) Interactions between isolates of powdery mildew (*Podosphaera aphanis*) and cultivars of strawberry, *Fragaria x ananassa*. *Soft Fruits*

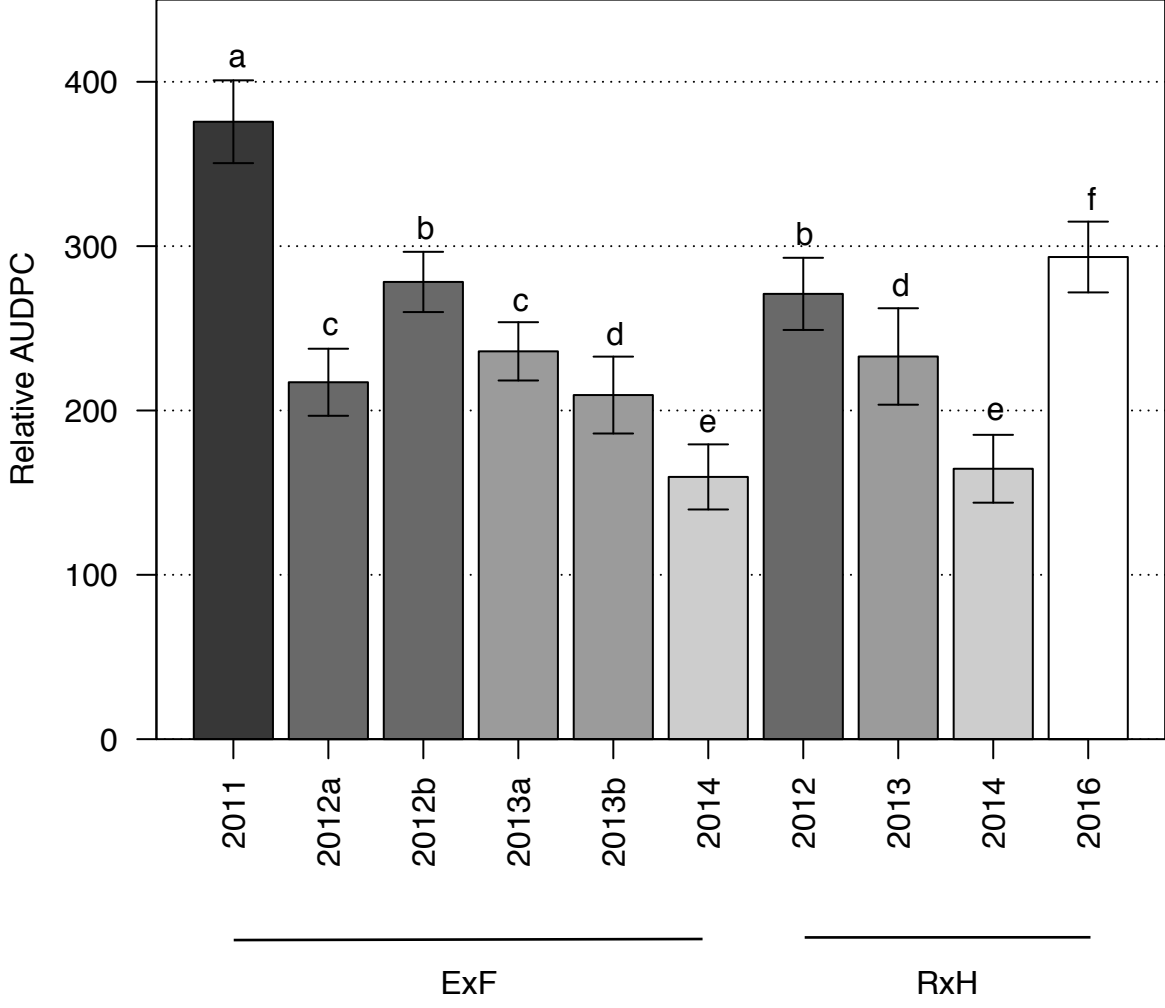



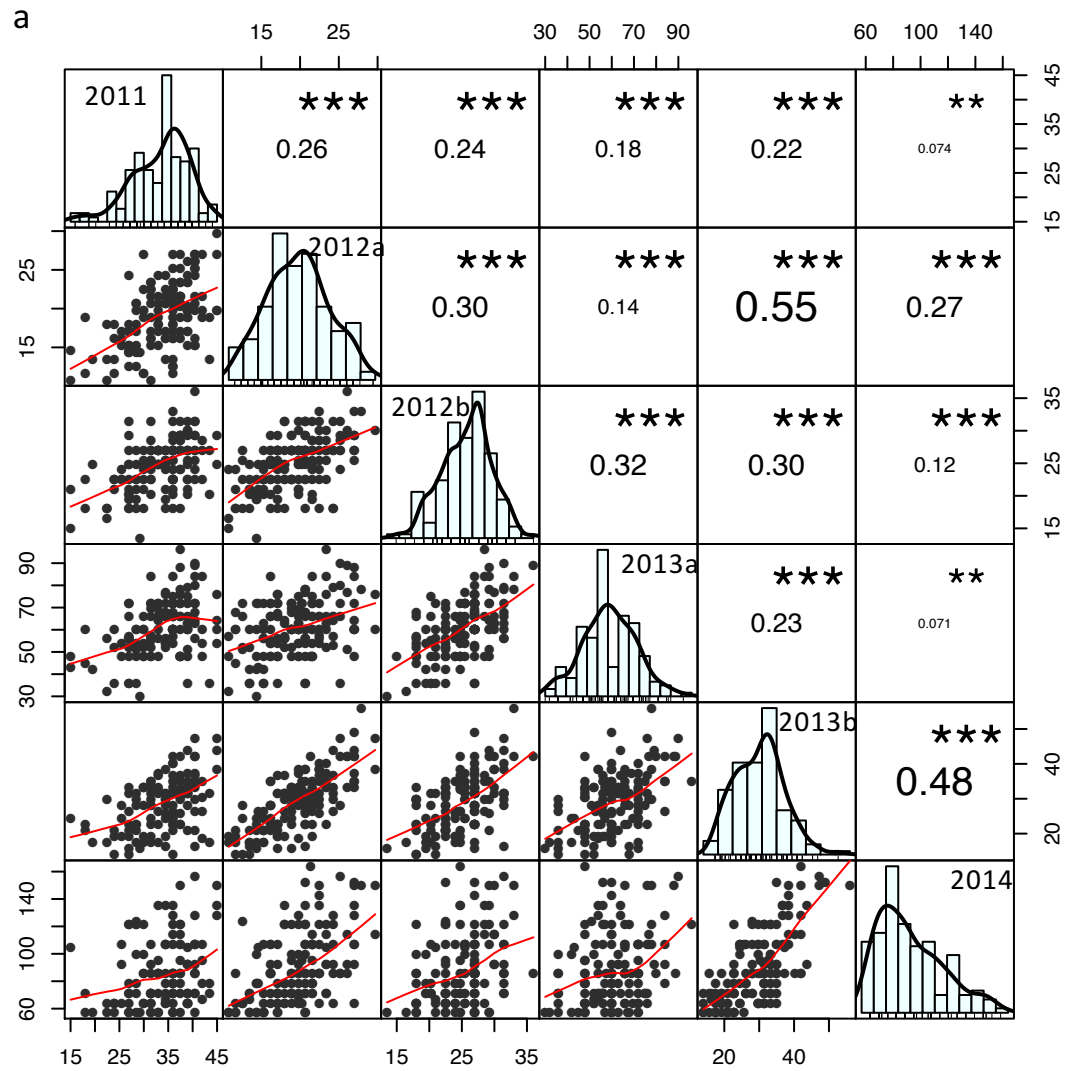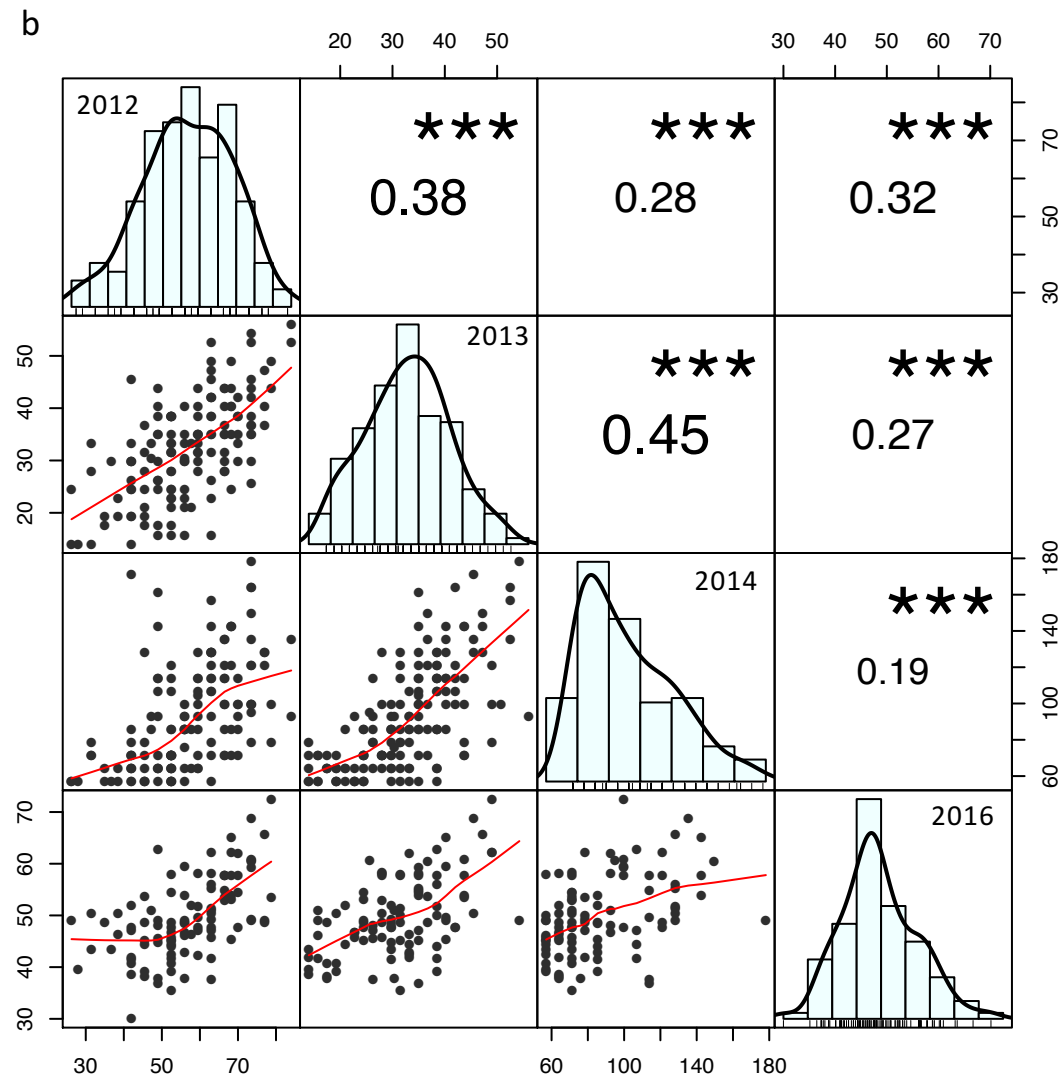

Emily

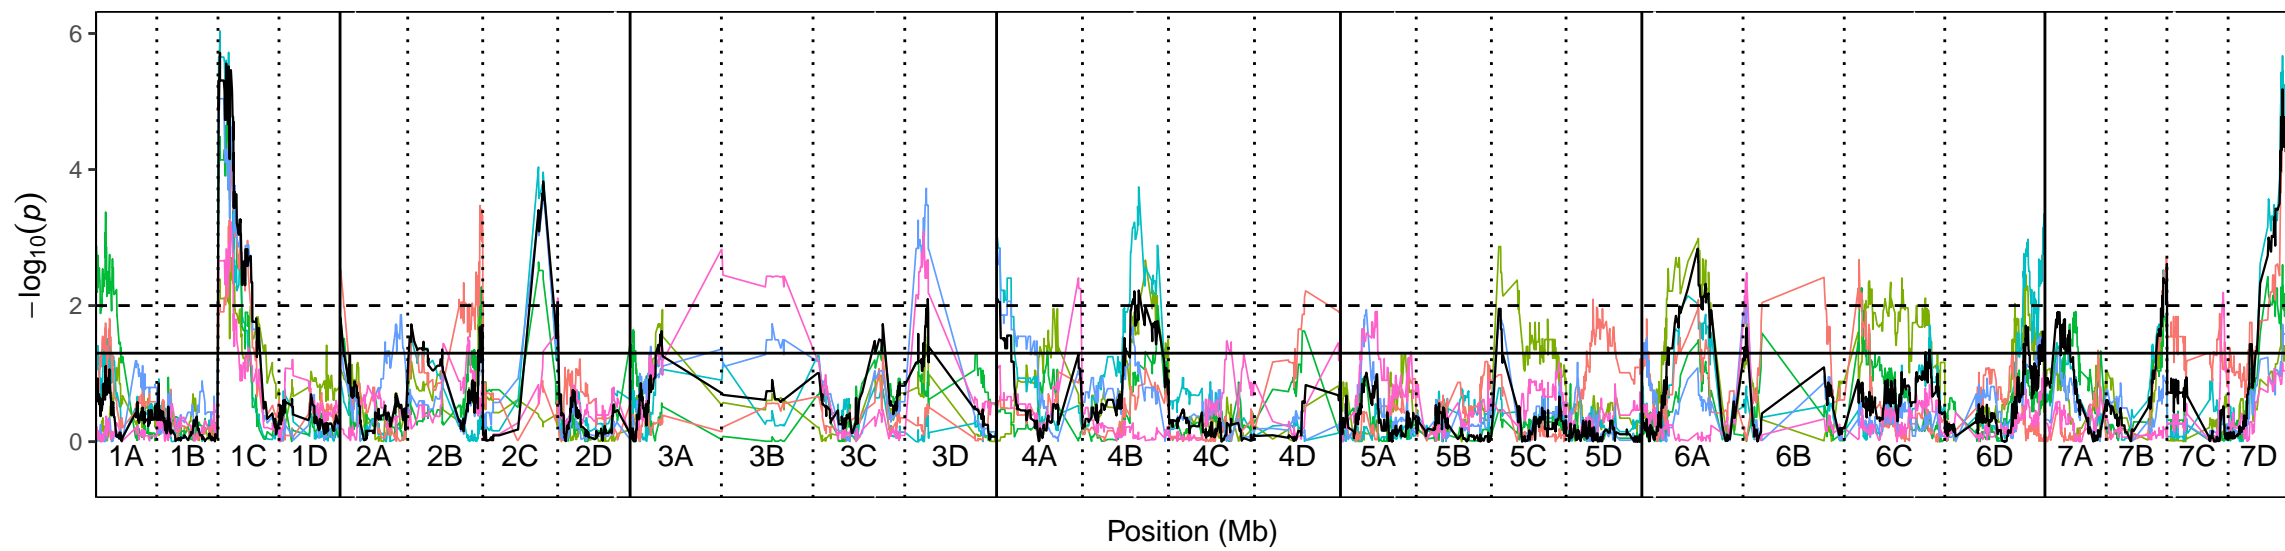

Fenella

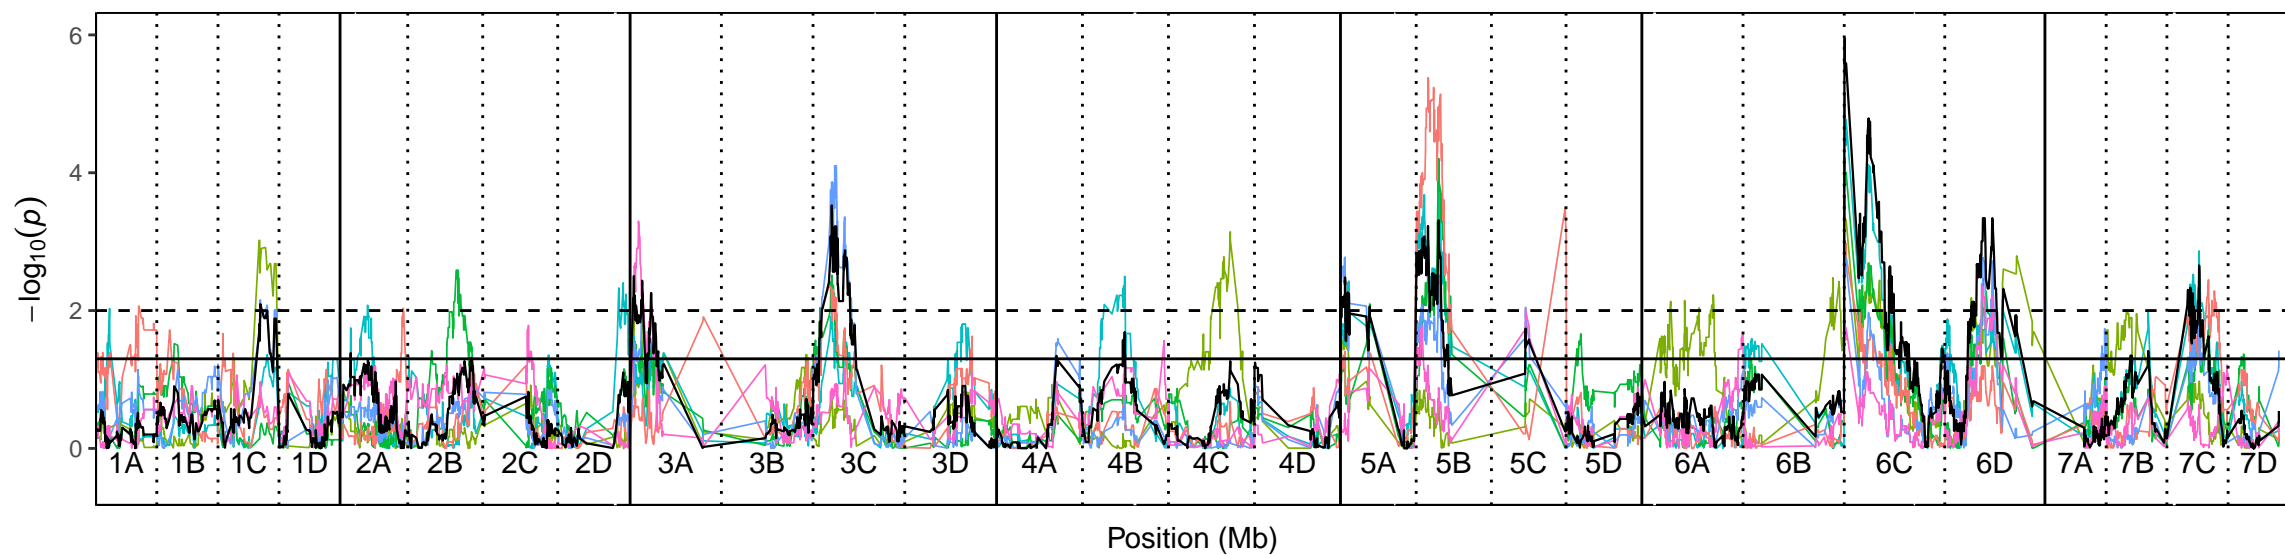

Shared

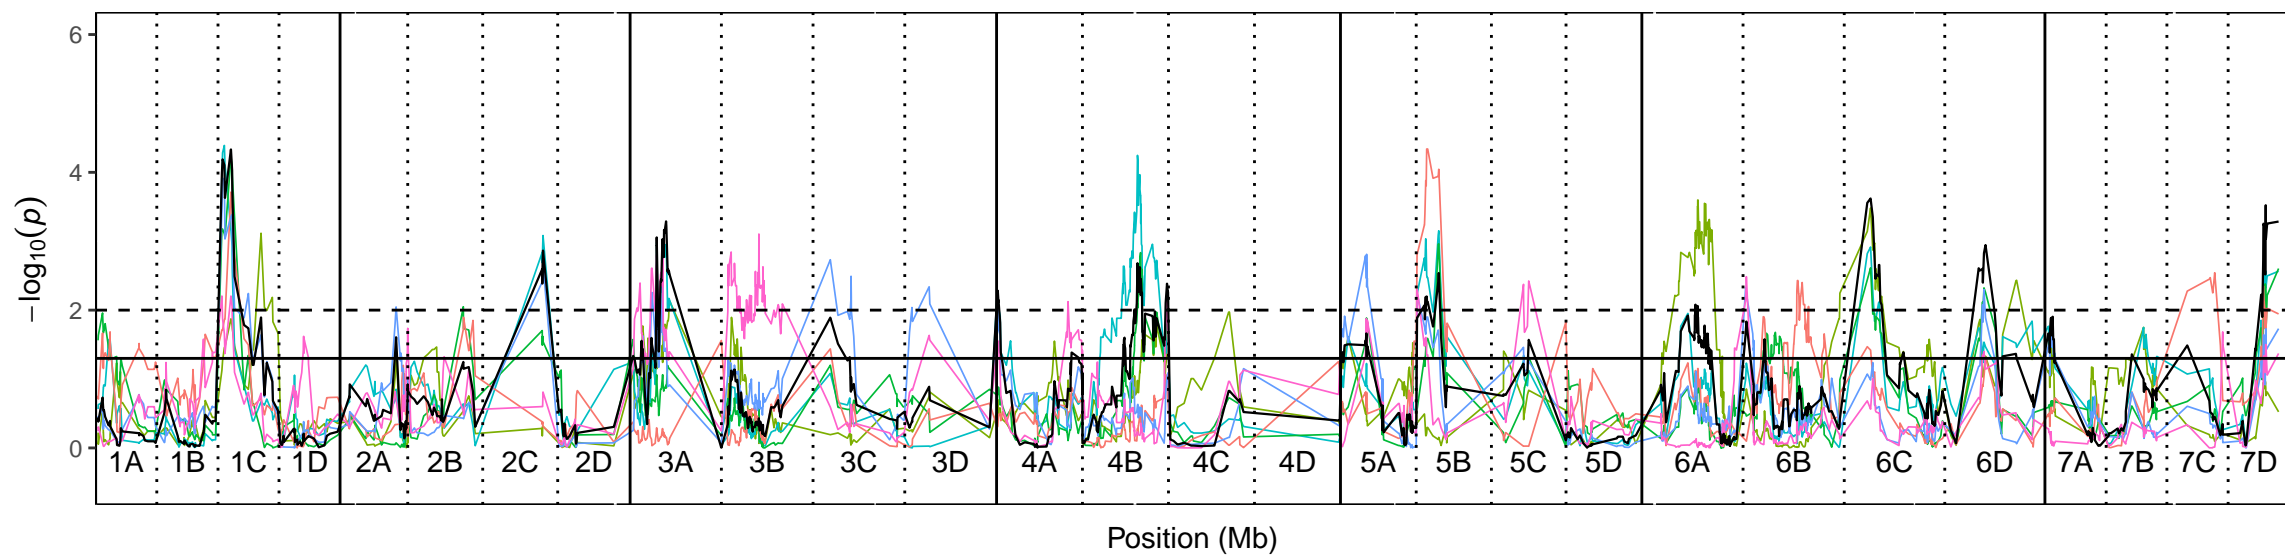

### Redgauntlet

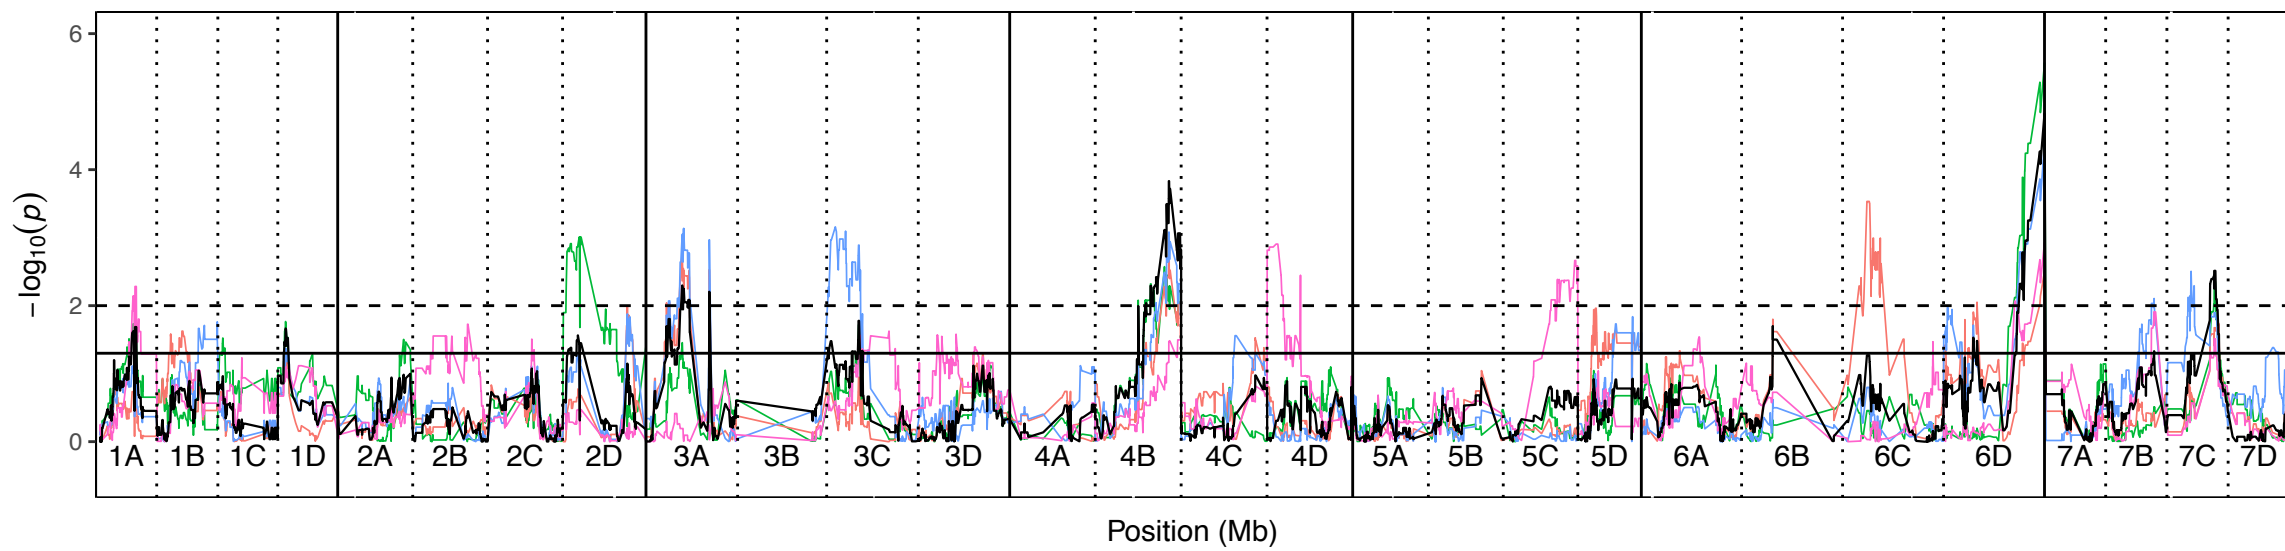

### Hapil

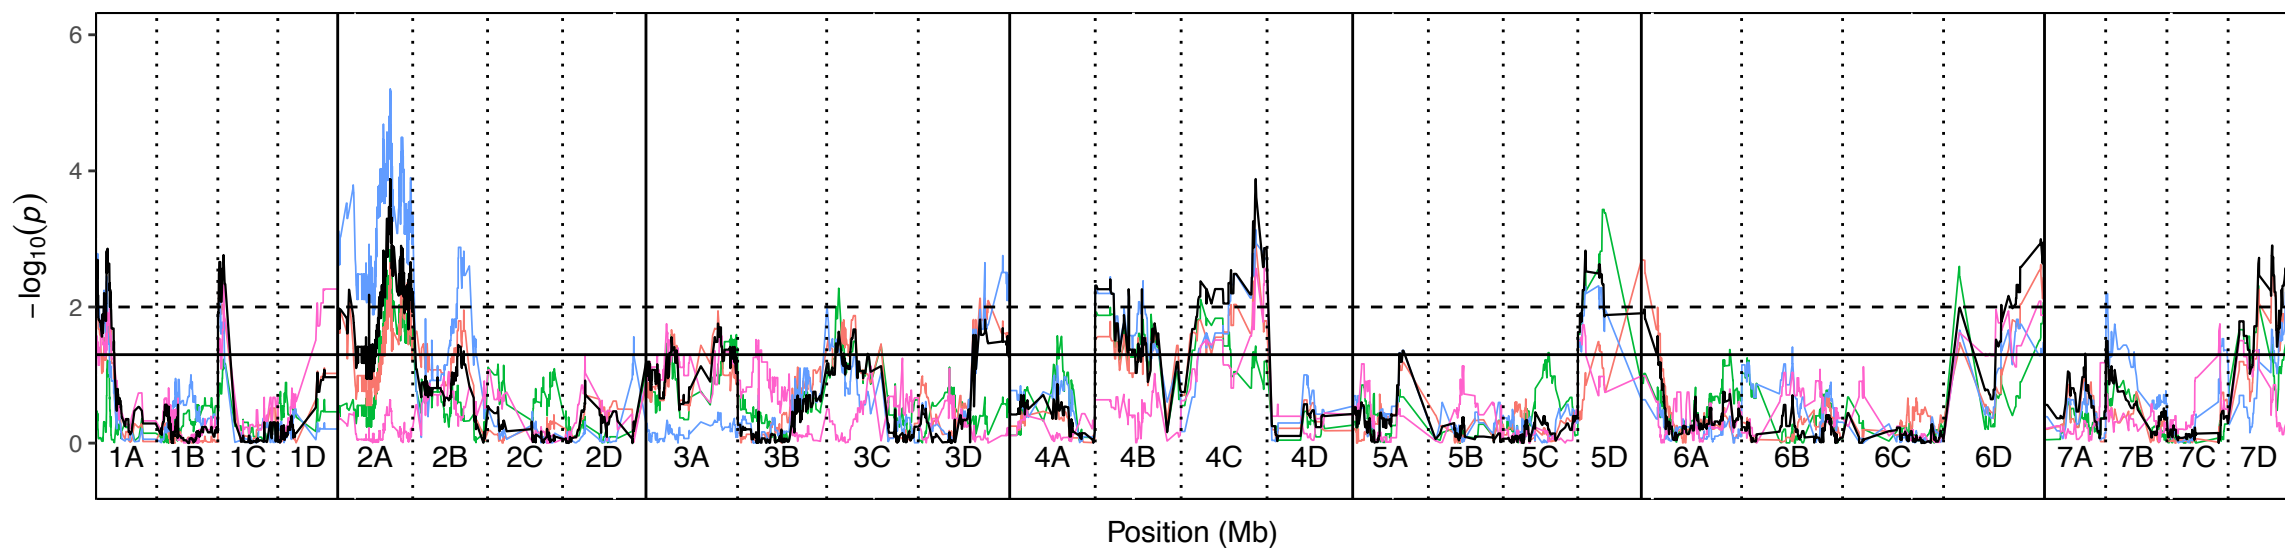

### Shared

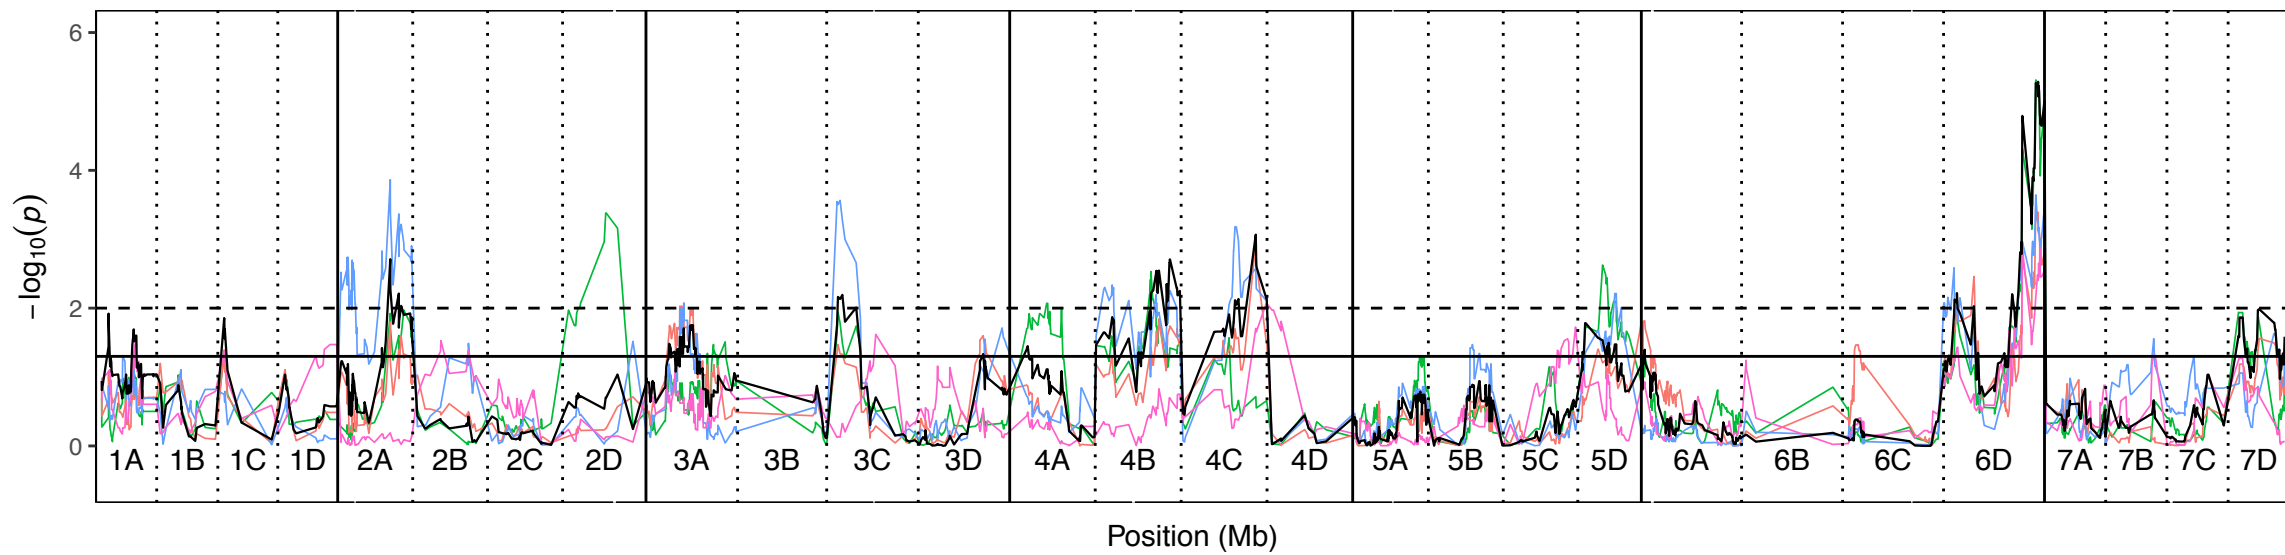

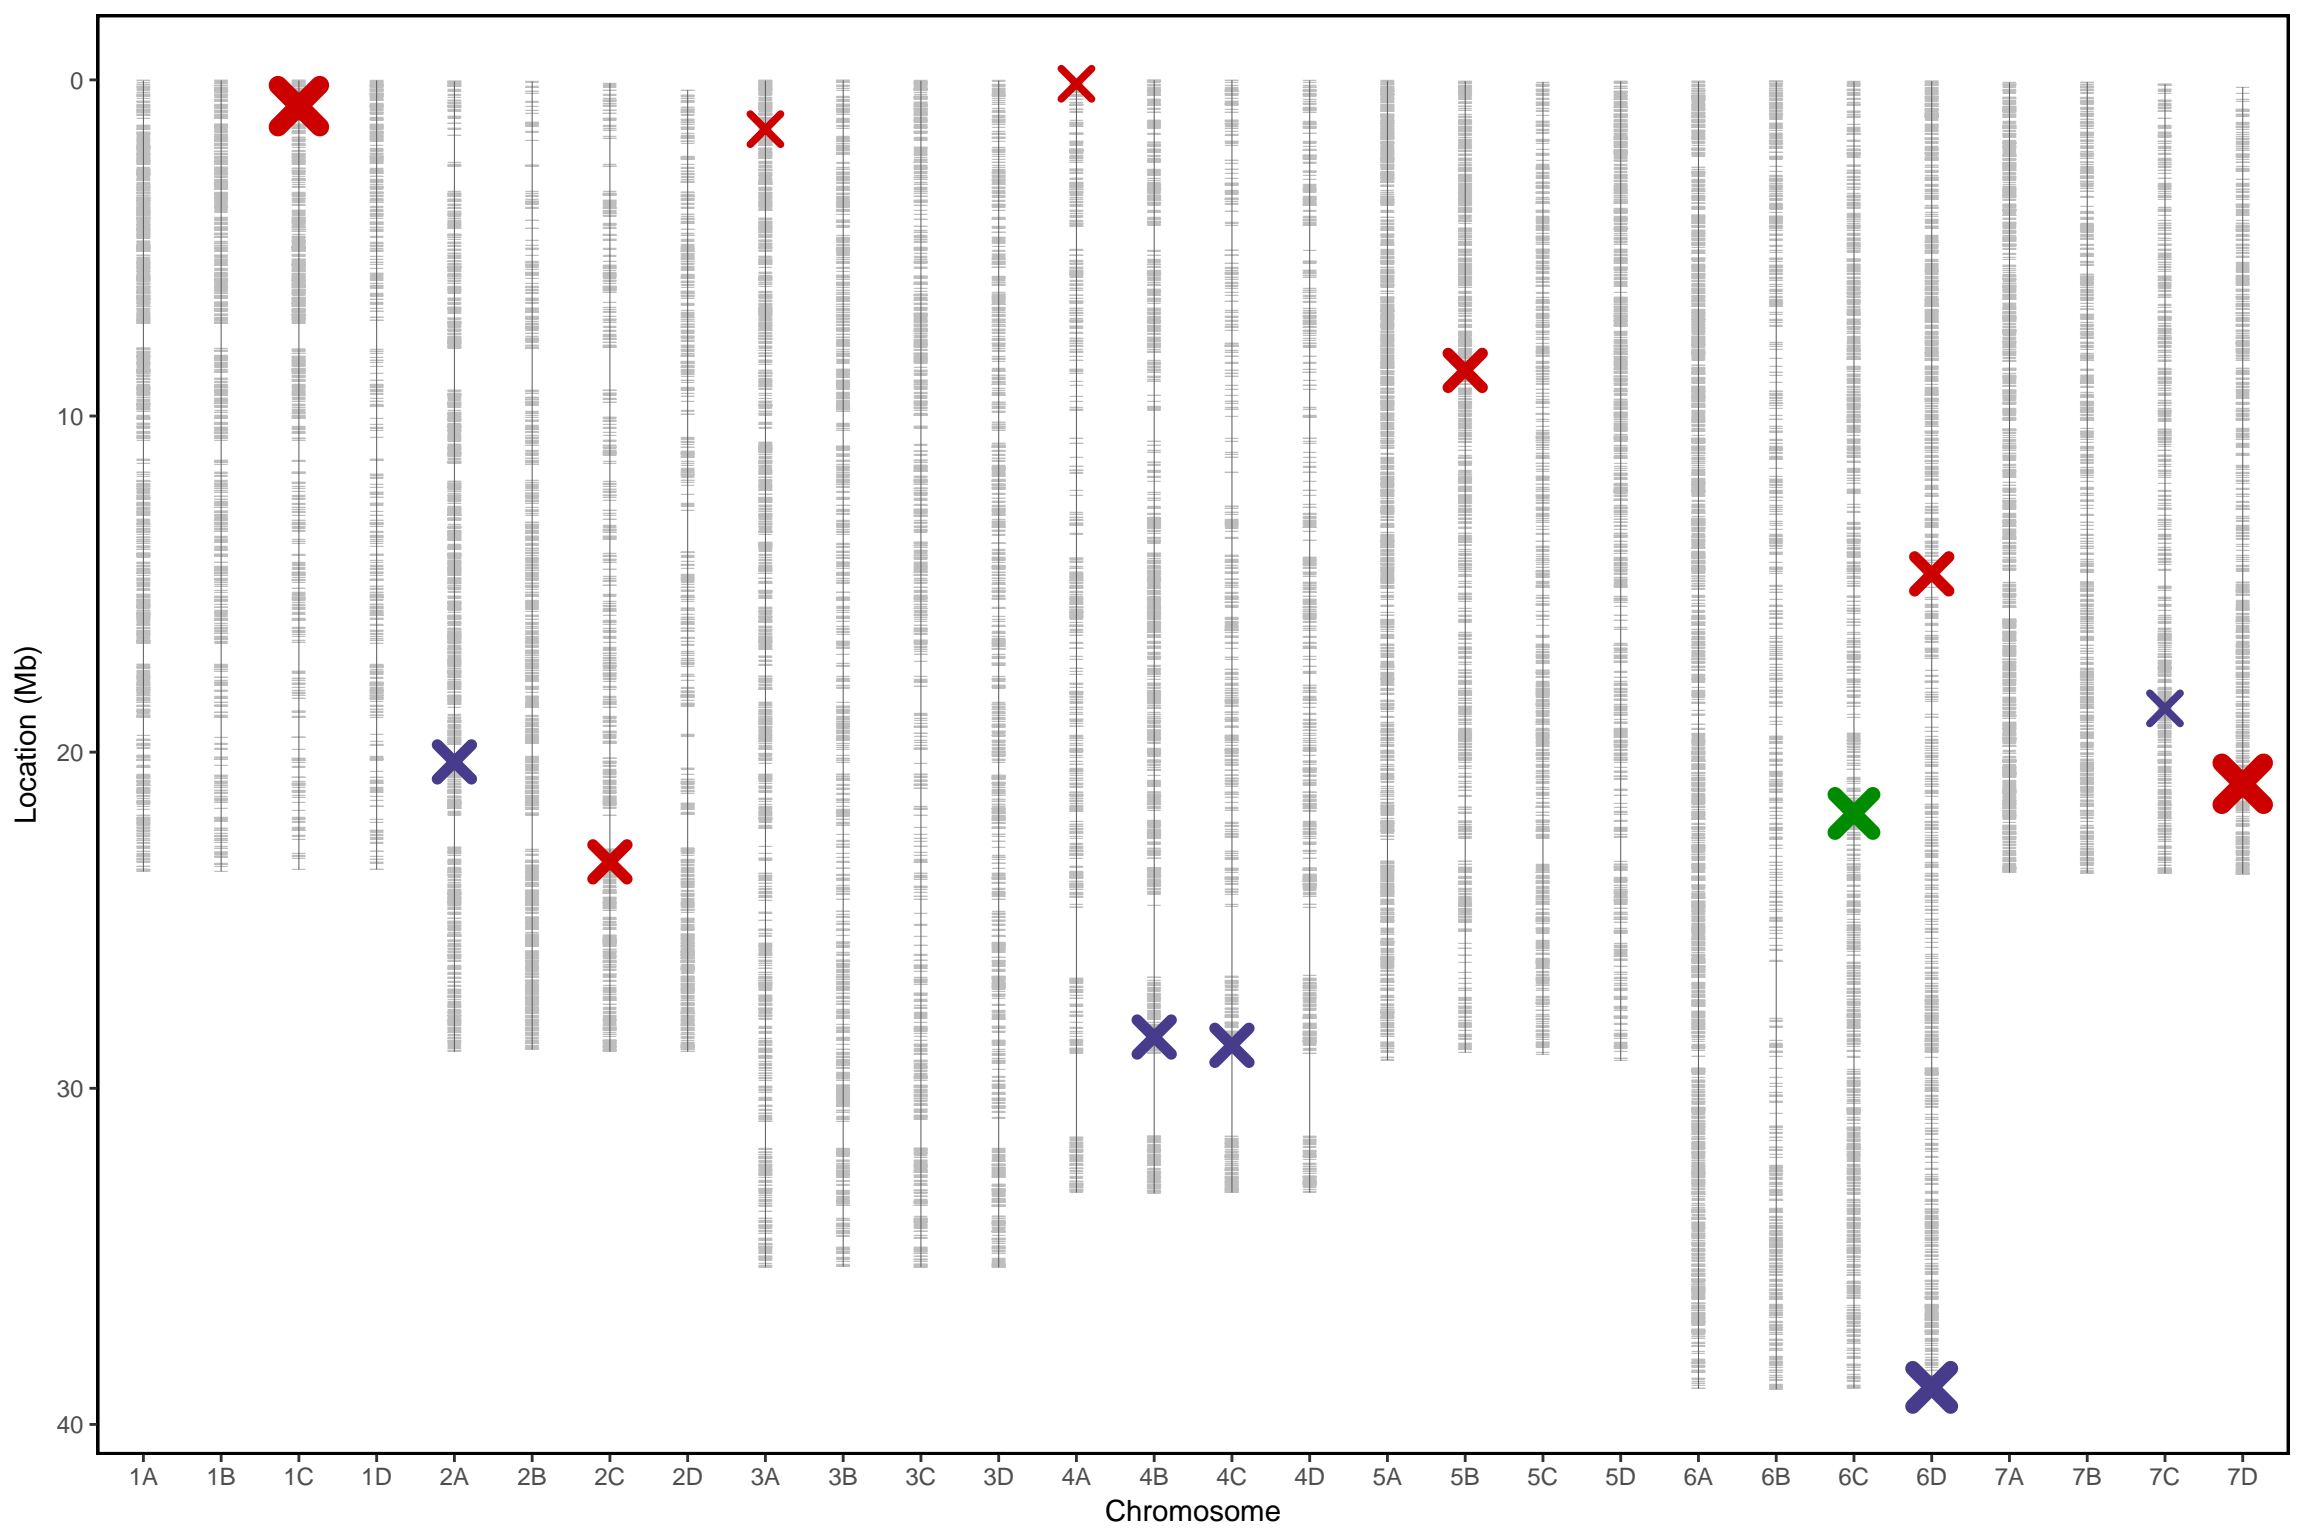

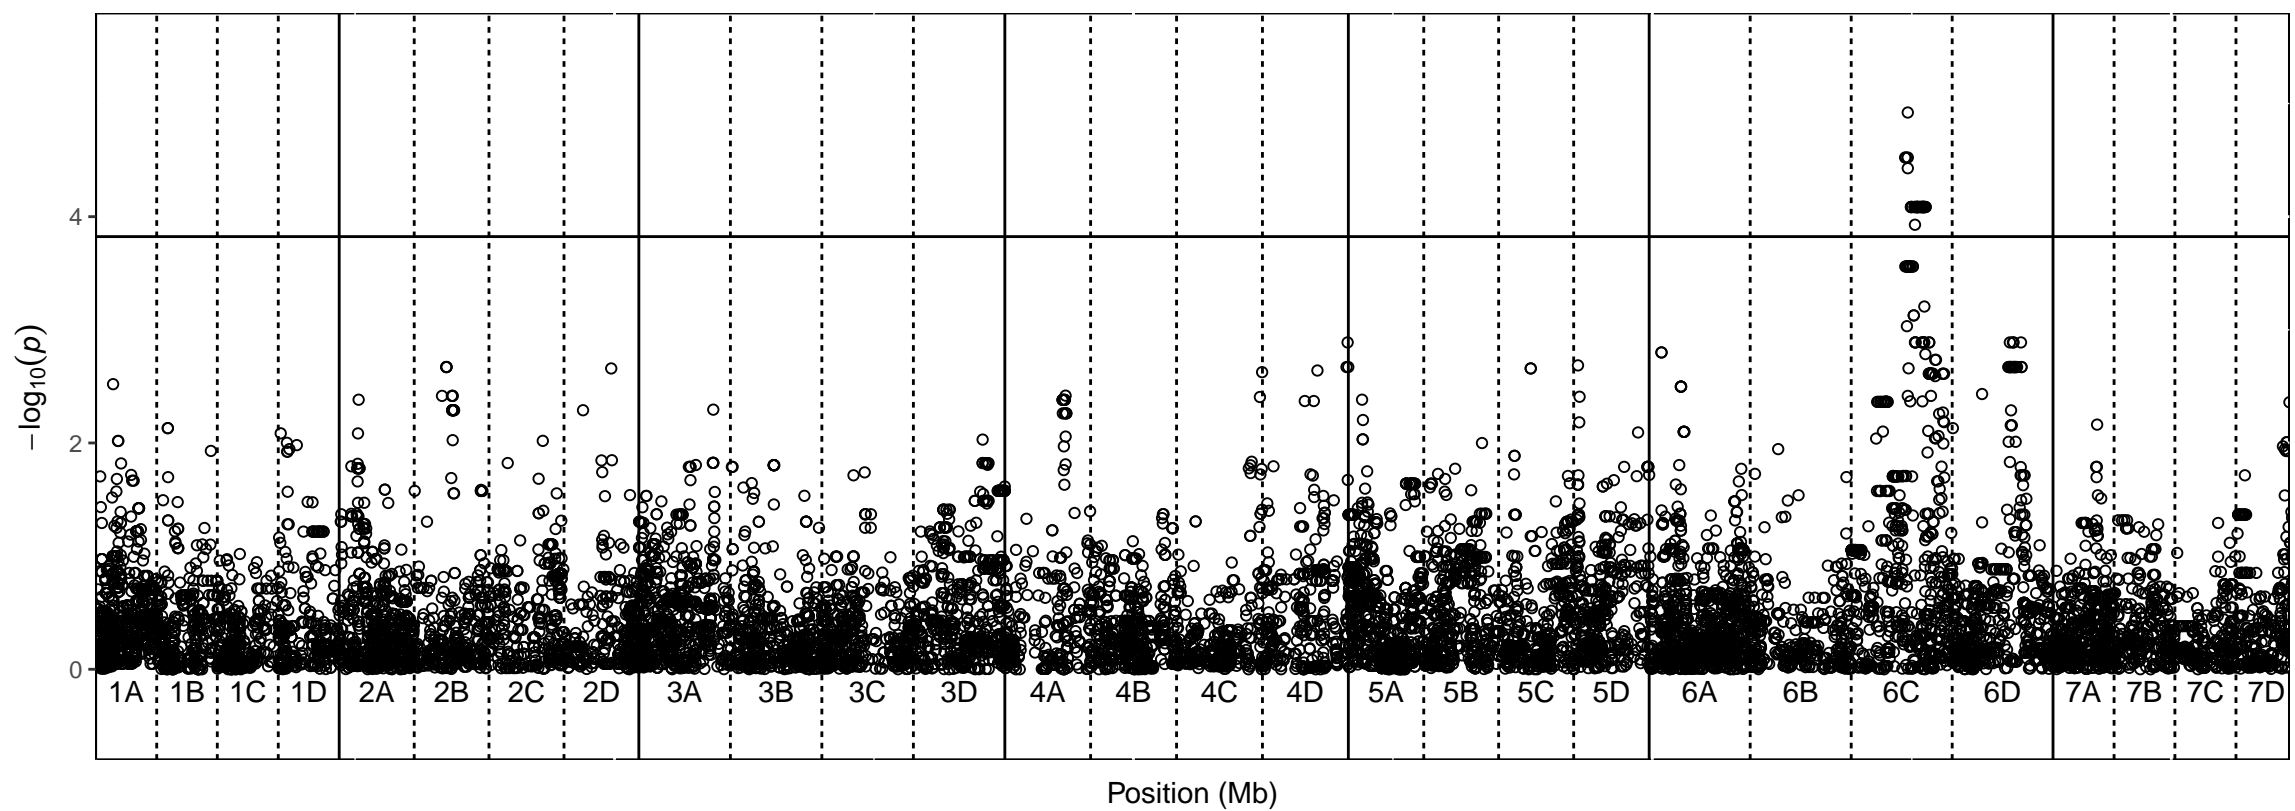

**Table 1** Model parameters for the predictive linear model for each phenotyping event.

Predicted versus observed disease scores for each genotype within the population.  $R^2$  is the coefficient of determination;  $H^2$  is broad-sense heritability associated with each phenotyping event.

| Mapping population | Year  | $R^2$ | df     | F value | p value               | RSE   | $H^2$ |
|--------------------|-------|-------|--------|---------|-----------------------|-------|-------|
| E x F              | 2011  | 0.32  | 5,144  | 13.49   | $8.6 \times 10^{-11}$ | 5.15  | 73    |
|                    | 2012a | 0.49  | 7,169  | 23.07   | $2.2 \times 10^{-16}$ | 3.08  | 21    |
|                    | 2012b | 0.34  | 5,157  | 16.9    | $6.2 \times 10^{-13}$ | 3.35  | 28    |
|                    | 2013a | 0.35  | 5,153  | 16.59   | $4.5 \times 10^{-13}$ | 6.78  | 47    |
|                    | 2013b | 0.54  | 8,138  | 20.3    | $2.2 \times 10^{-16}$ | 9.96  | 40    |
|                    | 2014  | 0.19  | 3,144  | 10.91   | $1.7 \times 10^{-06}$ | 24.13 | 45    |
|                    | BLUP  | 0.50  | 7, 172 | 24.78   | $1.4 \times 10^{-07}$ | 29.40 |       |
| R x H              | 2012  | 0.45  | 6,142  | 19.56   | $2.2 \times 10^{-16}$ | 7.90  | 54    |
|                    | 2013  | 0.32  | 5,150  | 14.18   | $2.3 \times 10^{-11}$ | 7.98  | 29    |
|                    | 2014  | 0.44  | 5,150  | 23.65   | $2.2 \times 10^{-16}$ | 22.31 | 56    |
|                    | 2016  | NA    | NA     | NA      | NA                    | NA    | 35    |
|                    | BLUP  | 0.30  | 3,160  | 22.92   | $2.1 \times 10^{-12}$ | 40.38 |       |

**Table 2** Focal single nucleotide polymorphisms linked with each quantitative trait loci associated with strawberry powdery mildew disease resistance identified through the Kruskal-Wallis analysis using the best linear unbiased prediction calculated across all phenotyping events. Closest resistance gene reported within 100 kbp if applicable. Grey shading indicates alleles that have maintained linkage disequilibrium across the wider germplasm. Bold entries denotes a focal single nucleotide polymorphisms linked with quantitative trait loci associated with strawberry powdery mildew disease resistance identified through the targeted marker association study

| QTL Name              | Linkage Group | Closest SNP           | Position (Mb) | p value                     | k             | Sig         | Parent            | Percentage change | PRE       | Closest R/S gene (bp) | Type of gene | Gene name                                        | Number R genes 100 kb |
|-----------------------|---------------|-----------------------|---------------|-----------------------------|---------------|-------------|-------------------|-------------------|-----------|-----------------------|--------------|--------------------------------------------------|-----------------------|
| <i>FaRPa1C</i>        | 1C            | NCCF4AEB3D07AA        | 0.8           | 1.9 x 10 <sup>6</sup>       | 22.7          | *****       | Emily             | -8.0              | 5.9       | 9694                  | RLK          | mrna30859.1-v1.0-hybrid                          | 3                     |
| <i>FaRP2A</i>         | 2A            | N11FA7F328DCFE        | 20.3          | 1.3 x 10 <sup>4</sup>       | 14.6          | ***         | Hapil             | -6.4              | 6.2       | Inside                | TMCC         | mrna10588.1-v1.0-hybrid                          | 1                     |
| <i>FaRPa2C</i>        | 2C            | NEC39F0185D6E0        | 23.3          | 1.5 x 10 <sup>4</sup>       | 14.4          | ***         | Emily             | -6.5              | 11.3      | 759*                  | TMCC*        | maker-LG6-augustus-gene-134.221-mRNA-1*          | 1                     |
| <i>FaRPa3A</i>        | 3A            | NDF8AAA986C2FC        | 1.5           | 3.2 x 10 <sup>3</sup>       | 8.7           | **          | Fenella           | -5.9              | 10.9      | Inside                | RLK          | maker-LG3-augustus-gene-0.106-mRNA-1             | 4                     |
| <i>FaRPa4A</i>        | 4A            | N2F8F042B96E95        | 0.1           | 7.9 x 10 <sup>3</sup>       | 7.1           | **          | Emily             | 4.6               | 17.3      | NA                    | NA           | NA                                               | 0                     |
| <i>FaRPa4B</i>        | 4B            | N1097FC31F9114        | 28.5          | 1.5 x 10 <sup>4</sup>       | 14.4          | ***         | Redgauntlet       | -6.4              | 9.4       | 22642                 | RLK          | mrna04495.1-v1.0-hybrid                          | 2                     |
| <i>FaRPa4C</i>        | 4C            | N294C2EE2573C5        | 28.7          | 1.3 x 10 <sup>4</sup>       | 14.6          | ***         | Hapil             | -6.9              | 16.0      | 37081                 | NBS          | augustus_masked-LG4-processed-gene-263.30-mRNA-1 | 1                     |
| <i>FaRPa5B</i>        | 5B            | ND6704E676517E        | 8.6           | 4.9 x 10 <sup>4</sup>       | 12.2          | ***         | Fenella           | -6.9              | 12.1      | 2241                  | TMCC         | mrna25962.1-v1.0-hybrid                          | 2                     |
| <i>FaRPa6D1</i>       | 6D            | N26C9D3CA535B9        | 14.7          | 4.6 x 10 <sup>4</sup>       | 12.3          | ***         | Fenella           | 6.4               | 12.5      | 51187                 | RLP          | augustus_masked-LG6-processed-gene-174.28-mRNA-1 | 2                     |
| <i>FaRPa6D2</i>       | 6D            | N69DA54ACC5C30        | 38.9          | 1.5 x 10 <sup>5</sup>       | 18.7          | ****        | Redgauntlet       | -11.3             | 6.3       | 9235                  | RLK          | maker-LG6-augustus-gene-381.175-mRNA-1           | 3                     |
| <i>FaRPa7C</i>        | 7C            | N57DED10A8A71A        | 18.7          | 3.1 x 10 <sup>3</sup>       | 8.8           | **          | Redgauntlet       | 9.4               | 7.1       | Inside                | RLK          | mrna21020.1-v1.0-hybrid                          | 3                     |
| <i>FaRPa7D</i>        | 7D            | NCB6B5546E8199        | 20.9          | 6.6 x 10 <sup>6</sup>       | 20.3          | *****       | Emily             | -6.8              | 12.0      | NA                    | NA           | NA                                               | 0                     |
| <b><i>FaRPa6C</i></b> | <b>6C</b>     | <b>N696DF7FD6DA22</b> | <b>21.8</b>   | <b>1.2 x 10<sup>5</sup></b> | <b>10.9**</b> | <b>****</b> | <b>Validation</b> | <b>NA</b>         | <b>NA</b> | <b>42581</b>          | <b>RLP</b>   | <b>mrna15948.1-v1.0-hybrid</b>                   | <b>2</b>              |

\*Mapped to LG6 not LG2

\*\*t test statistic from plink analysis
